# Supplementary material for: High-efficiency solution-processed small-molecule solar cells featuring gold nanoparticles
Source: Royal Society of Chemistry journal article supplement (doi:10.1039/c4ta03536d), 2014-10-07
Supplement: c4ta03536d1.pdf [file c4ta03536d1.pdf]

## Supporting Information

### High efficiency solution-processed small molecules solar cells featuring gold nanoparticles

Abd. Rashid bin Mohd Yusoff,<sup>a</sup> Seung Joo Lee,<sup>a</sup> Jin Jang,<sup>a</sup> Guankui Long,<sup>b</sup> Xiangjian Wan,<sup>b</sup>  
and Yongsheng Chen<sup>b</sup>

<sup>a</sup>Advanced Display Research Center, Department of Information Display, Kyung Hee University, Dongdaemoon-gu, Seoul 130-701, Korea.

Email: abdr@khu.ac.kr

<sup>b</sup>Key Laboratory of Functional Polymer Materials and the Centre of Nanoscale Science and Technology, Institute of Polymer Chemistry, College of Chemistry, Nankai University, Tianjin 300071, China.

Email: yschen99@nankai.edu.cn

**Table S1.** Photovoltaic parameters of plasmonic devices with different Au NPs concentrations.

| Au NPs concentrations | J <sub>sc</sub> (mA/cm <sup>2</sup> ) | V <sub>oc</sub> (V) | FF (%) | PCE (%) |
|-----------------------|---------------------------------------|---------------------|--------|---------|
| 10wt%                 | 13.86                                 | 0.92                | 65.91  | 7.58    |
| 20wt%                 | 14.24                                 | 0.92                | 66.83  | 8.25    |
| 40wt%                 | 14.42                                 | 0.92                | 67.31  | 8.92    |
